# Supplementary material for: Nonlinear dose–response relationship between prognostic nutritional index and short-term outcome in acute ischemic stroke: a prospective cohort study
Source: Front Nutr. 2025 Mar 10;12:1529146. doi: 10.3389/fnut.2025.1529146 (PMC11930808; doi:10.3389/fnut.2025.1529146)
Supplement: Supplementary file 1 [file Table_1.docx]

**Nonlinear dose-response relationship between prognostic nutritional index and short-term outcome in acute ischemic stroke: a prospective cohort study.**

**Running title:** PNI and outcome of AIS

Juan Wang1#, Xiongbin Cao2#, Shan zeng3, Li Zhou3, Jianping Huang3, Yong Han3*, Zhe Deng3*

1Department of Emergency, Shenzhen Yantian District People's Hospital, Southern University of Science and Technology Yantian Hospital, Shenzhen, 518081, Guangdong, China.

2Neurology Department, Shenzhen Longhua District Central Hospital, Shenzhen 518110, Guangdong, China.

3Department of Emergency, Shenzhen Second People's Hospital, The First Affiliated Hospital of Shenzhen University, Shenzhen 518035, Guangdong Province, China.

Juan Wang and Xiongbin Cao have contributed equally to this work.

*Corresponding author

Yong Han

Department of Emergency, Shenzhen Second People's Hospital

No.3002 Sungang Road, Futian District,

Shenzhen 518035,

Guangdong Province,

China.

Hanyong511023@163.com

*Corresponding author

Zhe Deng

Department of Emergency, Shenzhen Second People's Hospital

No.3002 Sungang Road, Futian District,

Shenzhen 518035,

Guangdong Province,

China.

Dengz163@163.com

**Table S1 Comparison of baseline characteristics before and after multiple imputations.**

|  | **Before multiple imputation** | **After multiple imputation** | Standardize diff. | P-value | P-value* |
| --- | --- | --- | --- | --- | --- |
| N | 1697 | 1697 |  |  |  |
| Age (years, mean ±SD) | 67.64 ± 11.30 | 67.64 ± 11.30 | 0.00 (-0.07, 0.07) | 1.000 | 1.000 |
| Neu (109/L, mean ±SD) | 5.58 ± 2.89 | 5.58 ± 2.89 | 0.00 (-0.07, 0.07) | 0.980 | 0.971 |
| Lyc (109/L, mean ±SD) | 1.64 ± 0.66 | 1.63 ± 0.66 | 0.00 (-0.07, 0.07) | 0.950 | 0.953 |
| BMI (kg/m2, mean ±SD) | 23.54 ± 3.26 | 23.54 ± 3.26 | 0.00 (-0.07, 0.07) | 1.000 | 1.000 |
| NIHSS score (median, quartile) | 5.89 ± 5.57 | 5.89 ± 5.60 | 0.00 (-0.07, 0.07) | 0.986 | 0.708 |
| HGB (g/L, mean ±SD) | 138.88 ± 20.44 | 138.86 ± 20.42 | 0.00 (-0.07, 0.07) | 0.977 | 0.968 |
| RDW (%, mean ±SD) | 38.49 ± 14.40 | 38.50 ± 14.40 | 0.00 (-0.07, 0.07) | 0.980 | 0.968 |
| PLT (109/L, mean ±SD) | 218.87 ± 74.80 | 218.80 ± 74.80 | 0.00 (-0.07, 0.07) | 0.978 | 0.981 |
| FIB (g/L , mean ±SD) | 3.24 ± 1.37 | 3.24 ± 1.37 | 0.00 (-0.07, 0.07) | 0.995 | 0.999 |
| HCY (umol/L, mean ±SD) | 18.49 ± 23.19 | 18.13 ± 23.19 | 0.02 (-0.05, 0.08) | 0.658 | 0.879 |
| ALB(g/L , mean ±SD) | 37.39 ± 4.25 | 37.39 ± 4.25 | 0.00 (-0.07, 0.07) | 1.000 | 1.000 |
| FPG(mmol/L , mean ±SD) | 6.84 ± 3.18 | 6.83 ± 3.19 | 0.00 (-0.07, 0.07) | 0.966 | 0.973 |
| TC (mmol/L , mean ±SD) | 4.59 ± 2.55 | 4.60 ± 2.58 | 0.00 (-0.06, 0.07) | 0.911 | 0.972 |
| TG (mmol/L, mean ±SD) | 1.68 ± 1.30 | 1.68 ± 1.30 | 0.00 (-0.07, 0.07) | 0.993 | 0.934 |
| HDL-c(mmol/L, mean ±SD) | 1.43 ± 3.81 | 1.40 ± 3.81 | 0.01 (-0.06, 0.07) | 0.860 | 0.884 |
| LDL-c(mmol/L, mean ±SD) | 2.98 ± 0.97 | 2.97 ± 0.97 | 0.01 (-0.06, 0.07) | 0.854 | 0.864 |
| D-dimer(mg/dL, mean ±SD) | 4.31 ± 13.49 | 4.31 ± 13.49 | 0.00 (-0.07, 0.07) | 1.000 | 1.000 |
| Sex(n,%) |  |  | 0.00 (-0.07, 0.07) | 1.000 | - |
| Male | 1057 (62.29%) | 1057 (62.29%) |  |  |  |
| Female | 640 (37.71%) | 640 (37.71%) |  |  |  |
| Previous stroke/TIA(n, %) | 141 (8.31%) | 141 (8.31%) | 0.00 (-0.07, 0.07) | 1.000 |  |
| DM | 502 (29.58%) | 502 (29.58%) | 0.00 (-0.07, 0.07) | 1.000 |  |
| CHD (n, %) | 377 (22.22%) | 377 (22.22%) | 0.00 (-0.07, 0.07) | 1.000 |  |
| Stroke etiology(n, %) |  |  | 0.00 (-0.07, 0.07) | 1.000 |  |
| SVO | 558 (32.88%) | 558 (32.88%) |  |  |  |
| CE | 342 (20.15%) | 342 (20.15%) |  |  |  |
| LAA | 660 (38.89%) | 660 (38.89%) |  |  |  |
| Undetermined | 137 (8.07%) | 137 (8.07%) |  |  |  |
| Hypertension | 959 (56.51%) | 959 (56.51%) | 0.00 (-0.07, 0.07) | 1.000 |  |
| Smoking (n, %) | 342 (20.15%) | 342 (20.15%) | 0.00 (-0.07, 0.07) | 1.000 |  |
| AF | 187 (11.02%) | 187 (11.02%) | 0.00 (-0.07, 0.07) | 1.000 |  |

Values are mean ± standard deviation or median (interquartile) or number (%)

TC, total cholesterol; PNÍ, prognostic nutritional index; TG, triglyceride; FIB, fibrinogen; HGB, hemoglobin concentration; AST, aspartate aminotransferase; NEU, neutrophil count; RDW, red blood cell distribution width ;LDL-c, low-density lipoproteins cholesterol; PLT, platelets; HCY, homocysteine; HDL-c, high-density lipoprotein cholesterol; Scr, serum creatinine; BMI, body mass index; ALB, serum albumin; AF, Atrial fibrillation; Lyc, Lymphocyte count; CHD, coronary heart disease; LAA, large artery atherosclerosis; TIA, transient ischemia attack. NIHSS, National Institute of Health stroke scale; CE, cardio embolism; SVO, small vessel occlusion;。

**Table S2 Normality Test of PNI**

| **Normality test** | | | | | | | |
| --- | --- | --- | --- | --- | --- | --- | --- |
|  | Kolmogorov-Smirnov test | | |  | Shapiro-Wilk test | | |
| **statistics** | Number | p-value |  | **statistics** | Number | p-value |
| PNI | 0.134 | 1697 | .085 |  | 0.989 | 1697 | .073 |

Table S3 Results of Univariate Analysis Using Binary Logistic Regression Model

|  | Statistics | Unfavorable (OR.95%CI) p | Mortality (OR.95%CI)p |
| --- | --- | --- | --- |
| Neu (109/L, mean ±SD) | 5.578 ± 2.886 | 1.316 (1.260, 1.374) <0.00001 | 1.217 (1.133, 1.307) <0.00001 |
| Lyc (109/L, mean ±SD) | 1.634 ± 0.662 | 0.324 (0.257, 0.409) <0.00001 | 0.034 (0.014, 0.084) <0.00001 |
| BMI (kg/m2, mean ±SD) | 23.539 ± 3.260 | 1.051 (1.012, 1.092) 0.00983 | 1.069 (0.971, 1.176) 0.17535 |
| NIHSS score (median, quartile) | 5.889 ± 5.598 | 0.986 (0.963, 1.009) 0.22589 | 0.983 (0.924, 1.046) 0.58338 |
| HGB (g/L, mean ±SD) | 138.861 ± 20.425 | 1.006 (0.999, 1.012) 0.07550 | 0.992 (0.977, 1.008) 0.33525 |
| RDW (%, mean ±SD) | 38.500 ± 14.395 | 1.010 (1.001, 1.019) 0.03644 | 1.014 (1.002, 1.026) 0.02305 |
| PLT (109/L, mean ±SD) | 218.796 ± 74.798 | 0.997 (0.995, 0.999) 0.00219 | 0.994 (0.989, 0.999) 0.01822 |
| HCY (umol/L, mean ±SD) | 18.134 ± 23.186 | 1.004 (0.999, 1.010) 0.09972 | 1.001 (0.989, 1.013) 0.88644 |
| FIB (g/L , mean ±SD) | 3.238 ± 1.371 | 1.312 (1.206, 1.428) <0.00001 | 1.058 (0.844, 1.328) 0.62337 |
| ALB(g/L , mean ±SD) | 37.393 ± 4.250 | 0.956 (0.929, 0.984) 0.00224 | 0.948 (0.883, 1.017) 0.13889 |
| PNI | 45.551 ± 5.674 | 0.916 (0.896, 0.937) <0.00001 | 0.863 (0.820, 0.909) <0.00001 |
| FPG(mmol/L , mean ±SD) | 6.832 ± 3.192 | 1.072 (1.036, 1.110) 0.00007 | 1.138 (1.069, 1.213) 0.00006 |
| TC (mmol/L , mean ±SD) | 4.601 ± 2.579 | 1.006 (0.963, 1.050) 0.80000 | 0.806 (0.600, 1.082) 0.15128 |
| TG (mmol/L, mean ±SD) | 1.680 ± 1.301 | 0.821 (0.716, 0.943) 0.00509 | 0.481 (0.280, 0.827) 0.00808 |
| HDL-c(mmol/L, mean ±SD) | 1.404 ± 3.814 | 0.976 (0.917, 1.039) 0.45033 | 0.993 (0.892, 1.106) 0.90382 |
| LDL-c(mmol/L, mean ±SD) | 2.969 ± 0.971 | 1.039 (0.914, 1.180) 0.56210 | 0.736 (0.507, 1.067) 0.10542 |
| Sex(n,%) |  |  |  |
| Male | 1057 (62.286%) | Ref | Ref |
| Female | 640 (37.714%) | 0.864 (0.665, 1.124) 0.27552 | 0.606 (0.291, 1.259) 0.17938 |
| Age (years, mean ±SD) | 67.640 ± 11.295 | 1.057 (1.044, 1.070) <0.00001 | 1.049 (1.017, 1.082) 0.00221 |
| D-dimer(mg/dL, mean ±SD) | 4.308 ± 13.493 | 1.042 (1.030, 1.054) <0.00001 | 1.016 (1.005, 1.027) 0.00465 |
| Previous stroke/TIA(n, %) |  |  |  |
| No | 1556 (91.691%) | 1.0 | - |
| Yes | 141 (8.309%) | 0.127 (0.047, 0.346) 0.00005 | - |
| DM(n, %) |  |  |  |
| No | 1195 (70.418%) | Ref | Ref |
| Yes | 502 (29.582%) | 1.076 (0.819, 1.413) 0.60027 | 0.761 (0.356, 1.624) 0.47994 |
| Hypertension (n, %) |  |  |  |
| No | 738 (43.489%) | Ref | Ref |
| Yes | 959 (56.511%) | 0.698 (0.543, 0.898) 0.00517 | 0.517 (0.266, 1.004) 0.05140 |
| CHD (n, %) |  |  |  |
| No | 1320 (77.784%) | Ref | Ref |
| Yes | 377 (22.216%) | 2.780 (2.123, 3.641) <0.00001 | 3.433 (1.783, 6.611) 0.00022 |
| AF (n, %) |  |  |  |
| No | 1510 (88.981%) | Ref | Ref |
| Yes | 187 (11.019%) | 2.718 (1.945, 3.800) <0.00001 | 5.899 (3.003, 11.585) <0.00001 |
| Smoking |  |  |  |
| No | 1355 (79.847%) | Ref | Ref |
| Yes | 342 (20.153%) | 0.571 (0.400, 0.816) 0.00211 | 0.344 (0.105, 1.126) 0.07779 |
| Stroke etiology (n, %) |  |  |  |
| SVO | 58 (32.882%) | Ref | Ref |
| CE | 342 (20.153%) | 1.236 (0.881, 1.735) 0.21959 | 0.762 (0.325, 1.786) 0.53194 |
| LAA | 660 (38.892%) | 0.770 (0.566, 1.048) 0.09620 | 0.490 (0.222, 1.078) 0.07619 |
| Undetermined | 137 (8.073%) | 1.300 (0.821, 2.058) 0.26320 | 0.471 (0.108, 2.065) 0.31846 |

TC, total cholesterol; PNÍ, prognostic nutritional index; TG, triglyceride; FIB, fibrinogen; HGB, hemoglobin concentration; AST, aspartate aminotransferase; NEU, neutrophil count; RDW, red blood cell distribution width ;LDL-c, low-density lipoproteins cholesterol; PLT, platelets; HCY, homocysteine; HDL-c, high-density lipoprotein cholesterol; Scr, serum creatinine; BMI, body mass index; ALB, serum albumin; AF, Atrial fibrillation; Lyc, Lymphocyte count; CHD, coronary heart disease; LAA, large artery atherosclerosis; TIA, transient ischemia attack. NIHSS, National Institute of Health stroke scale; CE, cardio embolism; SVO, small vessel occlusion.

Table S4 Comparison of Baseline Characteristics of Participants with PNI <49.3 and PNI ≥49.3

|  | <49.3 | >=49.3 | P-value |
| --- | --- | --- | --- |
| N | 1264 | 433 |  |
| Neu (109/L, mean ±SD) | 5.68 ± 3.09 | 5.28 ± 2.17 | 0.012 |
| BMI (kg/m2, mean ±SD) | 23.53 ± 3.24 | 23.56 ± 3.32 | 0.852 |
| Lyc (109/L, mean ±SD) | 1.42 ± 0.54 | 2.25 ± 0.61 | <0.001 |
| NIHSS score (median, quartile) | 4.00 (2.00-8.00) | 4.10 (2.01-7.98) | 0.503 |
| HGB (g/L, mean ±SD) | 136.28 ± 20.94 | 146.41 ± 16.69 | <0.001 |
| RDW (%, mean ±SD) | 39.02 ± 15.17 | 36.99 ± 11.75 | 0.012 |
| PLT (109/L, mean ±SD) | 211.58 ± 76.54 | 239.85 ± 65.12 | <0.001 |
| HCY (umol/L, mean ±SD) | 18.57 ± 25.32 | 16.85 ± 15.31 | 0.182 |
| FIB (g/L , mean ±SD) | 3.35 ± 1.43 | 2.91 ± 1.13 | <0.001 |
| ALB(g/L) | 36.10 ± 3.84 | 41.16 ± 2.95 | <0.001 |
| FPG (mmol/L , mean ±SD) | 6.86 ± 3.32 | 6.75 ± 2.78 | 0.540 |
| TC (mmol/L, mean ±SD) | 4.52 ± 2.90 | 4.83 ± 1.19 | 0.031 |
| TG (mmol/L, mean ±SD) | 1.57 ± 1.28 | 1.99 ± 1.32 | <0.001 |
| HDL-c(mmol/L, mean ±SD) | 1.38 ± 4.09 | 1.47 ± 2.86 | 0.683 |
| LDL-c(mmol/L, mean ±SD) | 2.89 ± 0.95 | 3.21 ± 0.99 | <0.001 |
| Age (years, mean ±SD) | 69.45 ± 10.82 | 62.36 ± 11.02 | <0.001 |
| D-dimer (mg/dL, mean ±SD) | 5.21 ± 15.40 | 1.67 ± 3.40 | <0.001 |
| Sex(n,%) |  |  | 0.881 |
| Male | 786 (62.18%) | 271 (62.59%) |  |
| Female | 478 (37.82%) | 162 (37.41%) |  |
| Previous stroke/TIA (n, %) | 111 (8.78%) | 30 (6.93%) | 0.228 |
| DM | 368 (29.11%) | 134 (30.95%) | 0.471 |
| Hypertension (n, %) | 698 (55.22%) | 261 (60.28%) | 0.067 |
| CHD (n, %) | 313 (24.76%) | 64 (14.78%) | <0.001 |
| AF (n, %) | 154 (12.18%) | 33 (7.62%) | 0.009 |
| smoking (n, %) | 221 (17.48%) | 121 (27.94%) | <0.001 |
| Stroke etiology(n, %) |  |  | 0.169 |
| SVO | 424 (33.54%) | 134 (30.95%) |  |
| CE | 265 (20.97%) | 77 (17.78%) |  |
| LAA | 473 (37.42%) | 187 (43.19%) |  |
| Undetermined | 102 (8.07%) | 35 (8.08%) |  |

Values are mean ± standard deviation or median (interquartile) or number (%)

TC, total cholesterol; PNÍ, prognostic nutritional index; TG, triglyceride; FIB, fibrinogen; HGB, hemoglobin concentration; AST, aspartate aminotransferase; NEU, neutrophil count; RDW, red blood cell distribution width ;LDL-c, low-density lipoproteins cholesterol; PLT, platelets; HCY, homocysteine; HDL-c, high-density lipoprotein cholesterol; Scr, serum creatinine; BMI, body mass index; ALB, serum albumin; AF, Atrial fibrillation; Lyc, Lymphocyte count; CHD, coronary heart disease; LAA, large artery atherosclerosis; TIA, transient ischemia attack. NIHSS, National Institute of Health stroke scale; CE, cardio embolism; SVO, small vessel occlusion;。

Table S5 Baseline Characteristics of Participants Who Completed Follow-Up and Those Who Did Not

|  | Completed follow-up visits | No follow-up visits | P-value |
| --- | --- | --- | --- |
| N | 1697 | 145 |  |
| Age (years, mean ±SD) | 67.64 ± 11.30 | 66.46 ± 11.59 | 0.229 |
| Neu (109/L, mean ±SD) | 5.58 ± 2.89 | 5.92 ± 3.49 | 0.174 |
| Lyc (109/L, mean ±SD) | 1.63 ± 0.66 | 1.60 ± 0.64 | 0.512 |
| BMI (kg/m2, mean ±SD) | 23.54 ± 3.26 | 23.50 ± 3.37 | 0.892 |
| NIHSS score (median, quartile) | 4.00 (2.00-8.00) | 4.00 (2.00-7.00) | 0.173 |
| HGB (g/L, mean ±SD) | 138.86 ± 20.42 | 139.39 ± 20.61 | 0.764 |
| RDW (%, mean ±SD) | 38.50 ± 14.40 | 39.37 ± 12.36 | 0.481 |
| PLT (109/L, mean ±SD) | 218.80 ± 74.80 | 222.88 ± 80.52 | 0.531 |
| FIB (g/L , mean ±SD) | 3.24 ± 1.37 | 3.31 ± 1.50 | 0.549 |
| HCY (umol/L, mean ±SD) | 13.70 (10.12-19.30) | 13.85 (9.93-20.10) | 0.637 |
| ALB(g/L, mean ±SD) | 37.39 ± 4.25 | 37.23 ± 4.27 | 0.653 |
| FPG(mmol/L , mean ±SD) | 6.83 ± 3.19 | 6.93 ± 3.43 | 0.715 |
| TC (mmol/L , mean ±SD) | 4.60 ± 2.58 | 4.49 ± 1.13 | 0.613 |
| TG (mmol/L, mean ±SD) | 1.68 ± 1.30 | 1.88 ± 1.83 | 0.088 |
| HDL-c(mmol/L, mean ±SD) | 1.40 ± 3.81 | 1.33 ± 2.95 | 0.811 |
| LDL-c(mmol/L, mean ±SD) | 2.97 ± 0.97 | 2.90 ± 0.89 | 0.409 |
| D-dimer (mg/dL, mean ±SD) | 4.31 ± 13.49 | 3.07 ± 6.97 | 0.276 |
| Sex(n,%) |  |  | 0.349 |
| Male | 1057 (62.29%) | 96 (66.21%) |  |
| Female | 640 (37.71%) | 49 (33.79%) |  |
| Stroke etiology (n, %) |  |  | 0.089 |
| SVO | 558 (32.88%) | 38(26.20%) |  |
| CE | 342 (20.15%) | 26(17.93%) |  |
| LAA | 660 (38.89%) | 54(37.24%) |  |
| Undetermined | 137 (8.07%) | 27(18.62%) |  |
| Hypertension | 959 (56.51%) | 10 (6.90%) | 0.552 |
| Hypertension (n, %) | 959 (56.51%) | 79 (54.48%) | 0.636 |
| AF (n, %) | 187 (11.02%) | 20 (13.79%) | 0.310 |
| Smoking (n, %) | 342 (20.15%) | 33 (22.76%) | 0.455 |

Values are mean ± standard deviation or median (interquartile) or number (%)

TC, total cholesterol; PNÍ, prognostic nutritional index; TG, triglyceride; FIB, fibrinogen; HGB, hemoglobin concentration; AST, aspartate aminotransferase; NEU, neutrophil count; RDW, red blood cell distribution width ; LDL-c, low-density lipoproteins cholesterol; PLT, platelets; HCY, homocysteine; HDL-c, high-density lipoprotein cholesterol; Scr, serum creatinine; BMI, body mass index; ALB, serum albumin; AF, Atrial fibrillation; Lyc, Lymphocyte count; CHD, coronary heart disease; LAA, large artery atherosclerosis; TIA, transient ischemia attack. NIHSS, National Institute of Health stroke scale; CE, cardio embolism; SVO, small vessel occlusion.
